# Supplementary material for: The effects of free condom distribution on HIV and other sexually transmitted infections in men who have sex with men
Source: Springer Nature journal article supplement (doi:10.1186/s12879-019-3839-0), 2019-03-04
Supplement: MOESM4 [file 16524466]

## SUPPLEMENTARY TABLE 1

### The effects of free condom distribution on HIV and other sexually transmitted infections in men who have sex with men

*Reinier J.M. Bom, Kalja van der Linden, Amy Matser, Nicolas Poulin, Maarten F. Schim van der Loeff, Bouko H.W. Bakker, and Theodoor F. van Boven*

Threshold values of the key parameters at which free condom distribution at PSVs remains cost-saving, highly cost-effective or cost-effective.

|                                   | Point estimate | Cost-saving | Highly cost-effective | Cost-effective |
|-----------------------------------|----------------|-------------|-----------------------|----------------|
| 'Condom use sometimes'            | 50%            | ≥0%         | ≥0%                   | ≥0%            |
| 'Influenced through free condoms' | 49.4%          | >8.9%       | >0.35%                | >0.12%         |
| 'Condom not used otherwise'       | 14.2%          | >2.6%       | >0.102%               | >0.034%        |
| 'Partner PSV'                     | 59.6%          | >10.4%      | >0.41%                | >0.14%         |
| 'Condom wastage'                  | 15%            | <84.6%      | <99.39%               | <99.80%        |
| 'Number partners'                 | 21.8           | <885        | <2624                 | <3503          |
| 'Number acts per partner'         | 2.2            | <89         | <264                  | <353           |
| 'Insertive acts'                  | 63.3%          | ≤100%       | ≤100%                 | ≤100%          |
| 'Market share'                    | 79.3%          | ≥0%         | ≥0%                   | ≥0%            |
| 'Condom effectiveness'            | 70%            | >13.4%      | >0.54%                | >0.18%         |
| 'Prevalence HIV PSV'              | 36.2%          | 4.2%-95.3%  | >0.019%               | ≥0%            |
| 'Infectivity HIV'                 | 1.025%         | >0.180%     | ≥0%                   | ≥0%            |

PSV = public sex venue.

All parameters are described in detail in Supplementary data 1.
